# Supplementary material for: Bis(imino)-6,7-dihydro-5H-quinoline-cobalt complexes as highly active catalysts for the formation of vinyl-terminated PE waxes; steps towards inhibiting deactivation pathways through targeted ligand design
Source: Royal Society of Chemistry journal article supplement (doi:10.1039/d1ra07279j), 2021-01-01
Supplement: d1ra07279j1.pdf [file d1ra07279j1.pdf]

## Supporting information

for

### **Bis(imino)-6,7-dihydro-5H-quinoline-cobalt complexes as highly active catalysts for the formation of vinyl-terminated PE waxes; steps towards inhibiting deactivation pathways through targeted ligand design**

Mingyang Han,<sup>a,b</sup> Zheng Zuo,<sup>a,b</sup> Yanping Ma,<sup>a</sup> Gregory A. Solan,<sup>\*a,c</sup> Xinquan Hu,<sup>\*d</sup> Tongling

Liang<sup>a</sup> and Wen-Hua Sun<sup>\*a,b,e</sup>

<sup>a</sup> Key Laboratory of Engineering Plastics and Beijing National Laboratory for Molecular Sciences, Institute of Chemistry, Chinese Academy of Sciences, Beijing 100190, China. E-mail: whsun@iccas.ac.cn; Fax: +86-10-62618239; Tel: +86-10-62557955.

<sup>b</sup> CAS Research/Education Center for Excellence in Molecular Sciences, University of Chinese Academy of Sciences, Beijing 100049, China.

<sup>c</sup> Department of Chemistry, University of Leicester, University Road, Leicester LE1 7RH, UK. E-mail: gas8@leicester.ac.uk. Tel.: +44-116-2522096.

<sup>d</sup> College of Chemical Engineering, Zhejiang University of Technology, Hangzhou 310014, China. Email: xin-quan@zjut.edu.cn

<sup>e</sup> State Key Laboratory for Oxo Synthesis and Selective Oxidation, Lanzhou Institute of Chemical Physics Chinese Academy of Sciences, Lanzhou 730000, China.

| Table of contents                                                                                                                                                                                                   | Page |
|---------------------------------------------------------------------------------------------------------------------------------------------------------------------------------------------------------------------|------|
| 1. <b>Table S1</b> Crystal data and structure refinement for <b>Co1</b> and <b>Co4</b>                                                                                                                              | S2   |
| 2. <b>Fig. S1</b> GPC traces of the polyethylene generated using <b>Co4</b> /MAO over different run times.                                                                                                          | S3   |
| 3. <b>Fig. S2</b> GPC traces of the polyethylene produced using <b>Co4</b> /MMAO at different Al:Co molar ratios.                                                                                                   | S3   |
| 4. <b>Fig. S3</b> <sup>1</sup> H NMR spectrum of the polyethylene wax generated using <b>Co4</b> /MAO (entry 7, Table 2); recorded in tetrachloroethane- <i>d</i> <sub>2</sub> (δH 6.0).                            | S4   |
| 5. <b>Fig. S4</b> <sup>13</sup> C NMR spectrum of the polyethylene sample generated using <b>Co4</b> /MAO (entry 7, Table 2); recorded in tetrachloroethane- <i>d</i> <sub>2</sub> (δC 74.37).                      | S4   |
| 6. <b>Fig. S5</b> Inverse-gated decoupled <sup>13</sup> C NMR spectrum of the polyethylene wax generated using <b>Co4</b> /MAO (entry 7, Table 2); recorded in tetrachloroethane- <i>d</i> <sub>2</sub> (δC 74.70). | S5   |
| 7. <b>Fig. S6</b> FT-IR spectra of the polyethylene generated using <b>Co1</b> /MMAO (top, entry 15, Table 3) and <b>Co4</b> /MMAO (middle, entry 3, Table 3 and bottom, entry 9, Table 3)                          | S5   |

**Table S1** Crystal data and structure refinement for **Co1** and **Co4**

|                                                 | <b>Co1</b> ·CH <sub>2</sub> Cl <sub>2</sub>                                                       | <b>Co4</b> ·2CH <sub>2</sub> Cl <sub>2</sub>                                                       |
|-------------------------------------------------|---------------------------------------------------------------------------------------------------|----------------------------------------------------------------------------------------------------|
| Crystal color                                   | brown                                                                                             | yellow                                                                                             |
| Empirical formula                               | C <sub>32</sub> H <sub>31</sub> Cl <sub>2</sub> CoN <sub>3</sub> ·CH <sub>2</sub> Cl <sub>2</sub> | C <sub>34</sub> H <sub>35</sub> Cl <sub>2</sub> CoN <sub>3</sub> ·2CH <sub>2</sub> Cl <sub>2</sub> |
| Formula weight                                  | 672.35                                                                                            | 785.33                                                                                             |
| T (K)                                           | 170(10)                                                                                           | 220(13)                                                                                            |
| Wavelength (Å)                                  | 1.54184                                                                                           | 1.54184                                                                                            |
| Crystal system                                  | monoclinic                                                                                        | monoclinic                                                                                         |
| Space group                                     | P21/c                                                                                             | C2/c                                                                                               |
| a /Å                                            | 8.8111(2)                                                                                         | 36.8374(6)                                                                                         |
| b/Å                                             | 14.2113(3)                                                                                        | 12.2282(2)                                                                                         |
| c/Å                                             | 25.8363(4)                                                                                        | 17.1691(2)                                                                                         |
| α/°                                             | 90                                                                                                | 90                                                                                                 |
| β/°                                             | 95.520(2)                                                                                         | 91.4370(10)                                                                                        |
| γ/°                                             | 90                                                                                                | 90                                                                                                 |
| Volume/Å <sup>3</sup>                           | 3220.15(11)                                                                                       | 7731.5(2)                                                                                          |
| Z                                               | 4                                                                                                 | 8                                                                                                  |
| ρ <sub>calc</sub> /cm <sup>3</sup>              | 1.387                                                                                             | 1.349                                                                                              |
| μ/mm <sup>-1</sup>                              | 7.437                                                                                             | 7.514                                                                                              |
| F(000)                                          | 1388.0                                                                                            | 3240.0                                                                                             |
| Crystal size/mm <sup>3</sup>                    | 0.15 × 0.1 × 0.08                                                                                 | 0.15 × 0.08 × 0.03                                                                                 |
| θ range (°)                                     | 6.874 to 150.922<br>-10 ≤ h ≤ 10                                                                  | 4.8 to 150.932<br>-46 ≤ h ≤ 46                                                                     |
| Limiting indices                                | -17 ≤ k ≤ 16<br>-32 ≤ l ≤ 32                                                                      | -14 ≤ k ≤ 15<br>-21 ≤ l ≤ 16                                                                       |
| No. of rflns collected                          | 22545                                                                                             | 32855                                                                                              |
| No. unique rflns [R(int)]                       | 6376(0.0347)                                                                                      | 7691(0.0561)                                                                                       |
| Completeness to θ (%)                           | 99.98                                                                                             | 99.75                                                                                              |
| Goodness of fit on F <sup>2</sup>               | 0.955                                                                                             | 1.076                                                                                              |
| Final R indices [I > 2σ(I)]                     | R1 = 0.0495<br>wR2 = 0.1303                                                                       | R1 = 0.0657<br>wR2 = 0.1963                                                                        |
| R indices (all data)                            | R1 = 0.0584<br>wR2 = 0.1364                                                                       | R1 = 0.0849<br>wR2 = 0.2216                                                                        |
| Largest diff peak and hole (e Å <sup>-3</sup> ) | 0.93/-0.65                                                                                        | 1.18/-0.85                                                                                         |

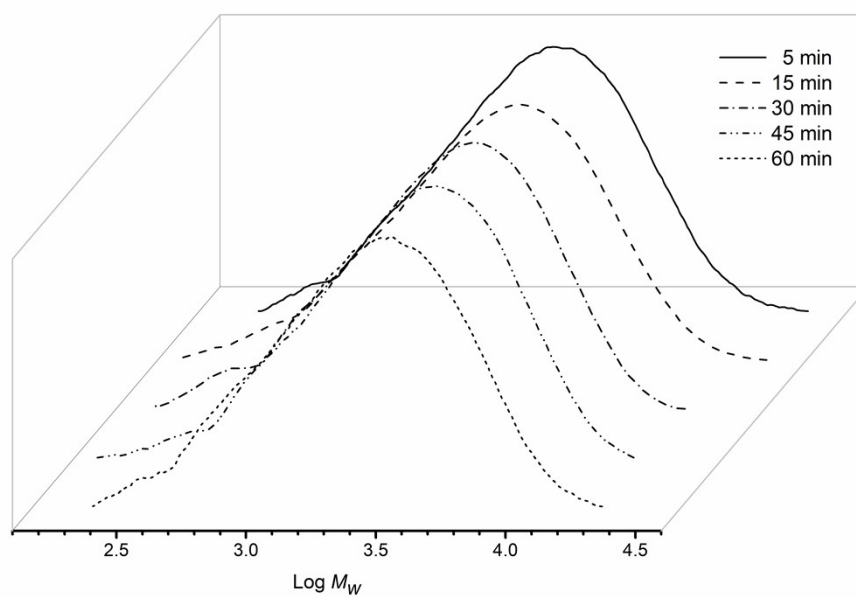

**Fig. S1** GPC traces of the polyethylene generated using **Co4/MAO** over different run times (entries 7 and 10 – 13, Table 2)

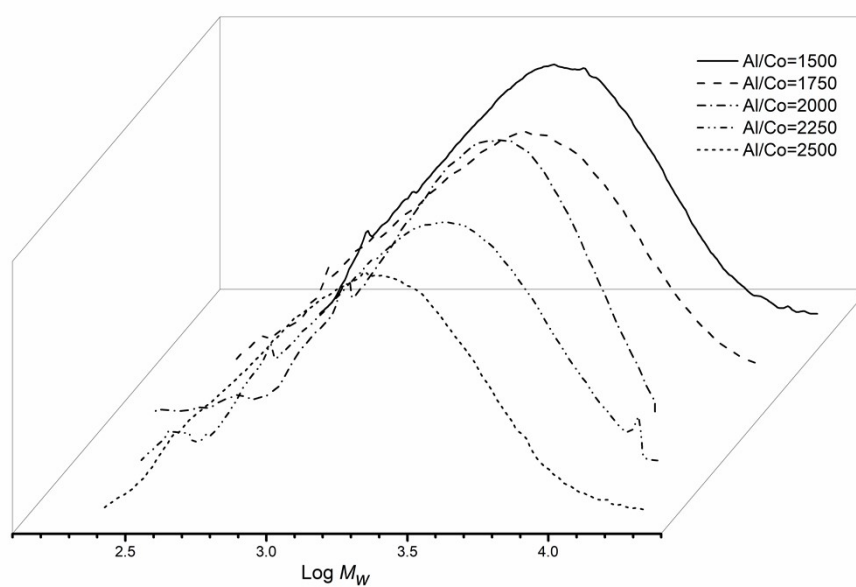

**Fig. S2** GPC traces of the polyethylene produced using **Co4/MMAO** at different Al:Co molar ratios (entries 3 and 6 – 9, Table 3).

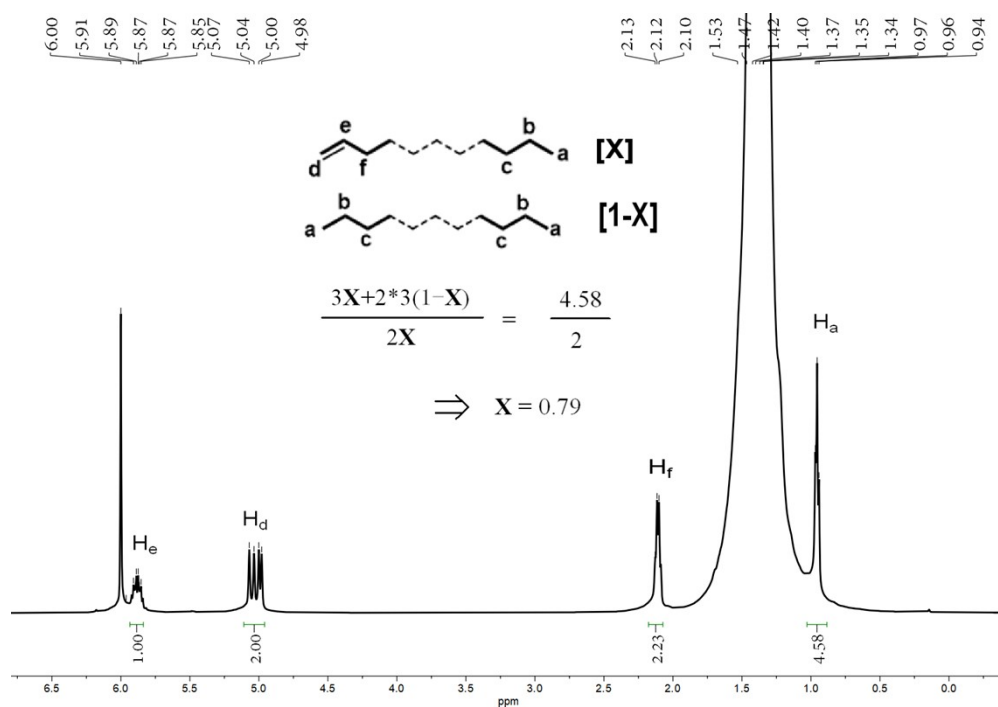

**Fig. S3** <sup>1</sup>H NMR spectrum of the polyethylene wax generated using **Co4**/MAO (entry 7, Table 2); recorded in tetrachloroethane-*d*<sub>2</sub> (δH 6.0).

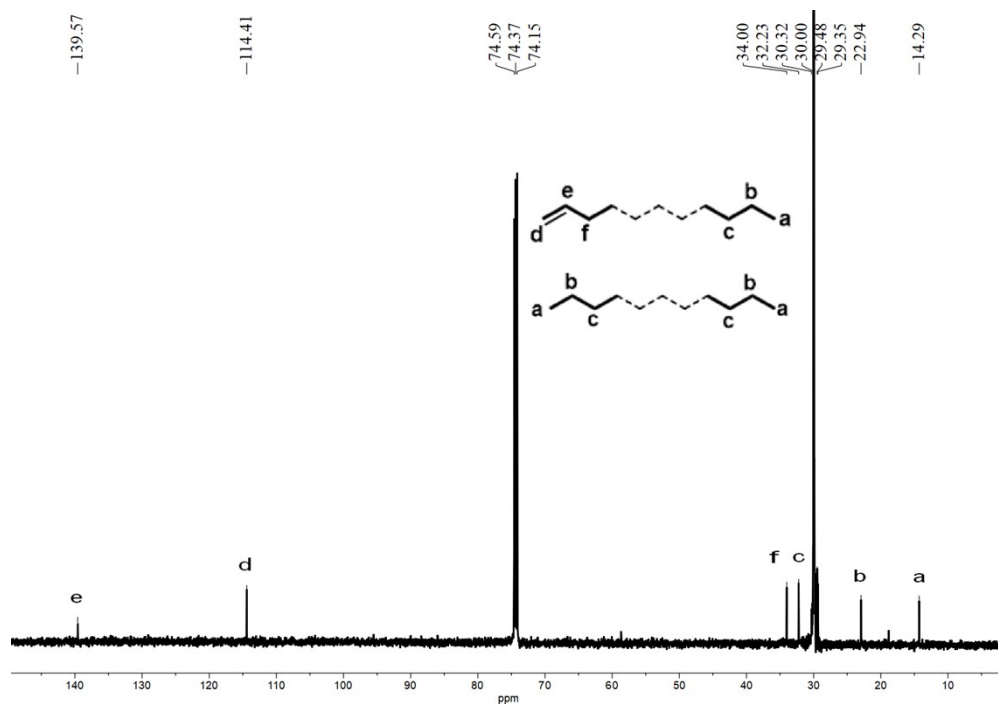

**Fig. S4** <sup>13</sup>C NMR spectrum of the polyethylene sample generated using **Co4**/MAO (entry 7, Table 2); recorded in tetrachloroethane-*d*<sub>2</sub> (δC 74.37).

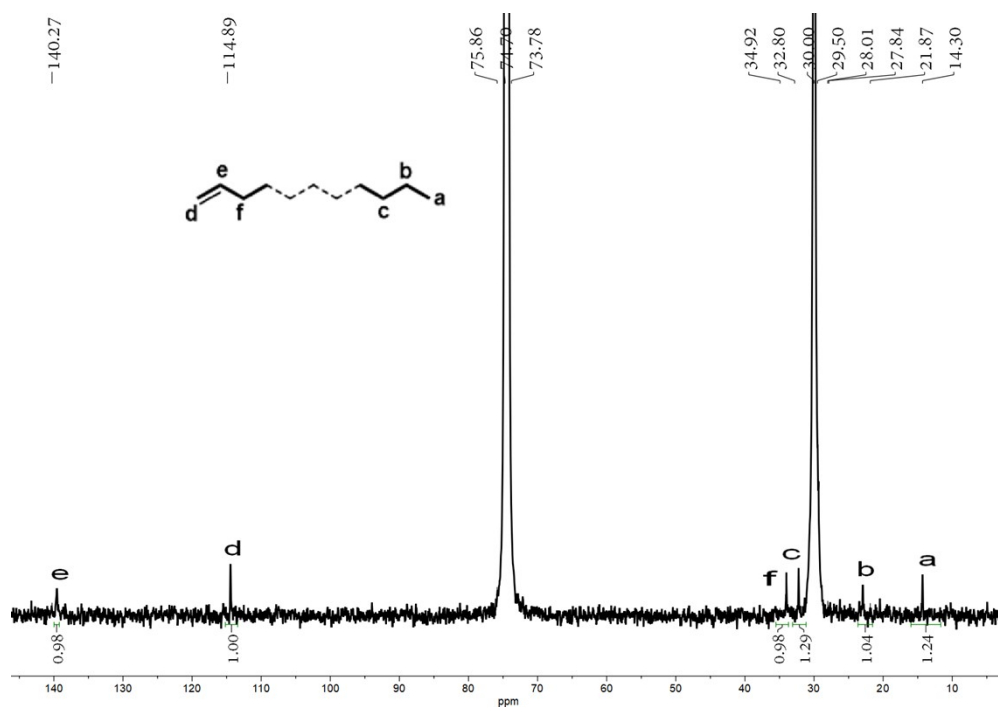

**Fig. S5** Inverse-gated decoupled  $^{13}\text{C}$  NMR spectrum of the polyethylene wax generated using **Co4**/MAO (entry 7, Table 2); recorded in tetrachloroethane- $d_2$  ( $\delta\text{C}$  74.70).

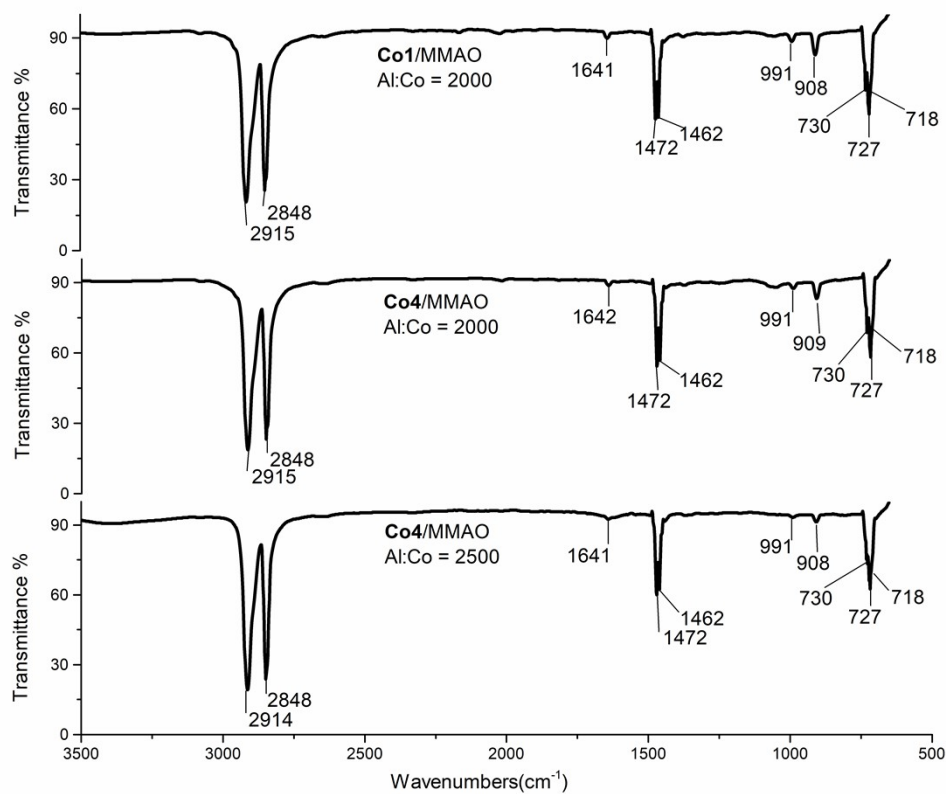

**Fig. S6** FT-IR spectra of the polyethylene generated using **Co1**/MMAO (top, entry 15, Table 3) and **Co4**/MMAO (middle, entry 3, Table 3 and bottom, entry 9, Table 3)
